# Supplementary material
Source: Springer Nature journal article supplement (https://www.springermedizin.de/resource/supplementary/12890_2012_349_MOESM2_ESM.pdf/9505040)

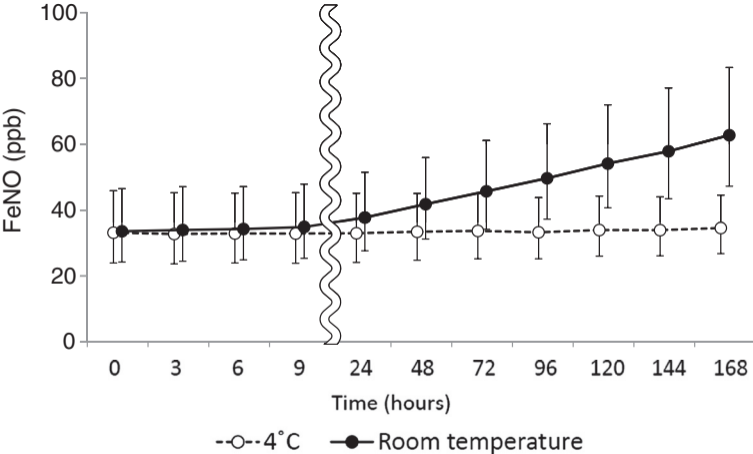

Supplement: MOESM2 [file 9505040]
